# Supplementary material
Source: MDPI journal article supplement (https://www.mdpi.com/2311-7524/9/2/282)
Supplement: s1 [file s1]

**Table S1.** Identified phenotype mean value of YS and *Brcdl*<sup>YS</sup>

|                            | Plant height | Leaf length | Leaf width  |
|----------------------------|--------------|-------------|-------------|
| YS                         | 8.53±0.31    | 8.17±0.06   | 5.53±0.21   |
| <i>Brcdl</i> <sup>YS</sup> | 3.43±0.12**  | 7.03±0.15** | 3.30±0.10** |

Note: Significant levels: \*\*P<0.01
