# Supplementary material
Source: MDPI journal article supplement (https://www.mdpi.com/2311-7524/9/2/282)
Supplement: s1 [file s1]

Archive with 5 entries (5 files):
- supplementary material.pdf
- Table.S1.pdf
- Table.S2.xlsx
- Table.S3.pdf
- Table.S4.xlsx
