# Supplementary material
Source: MDPI journal article supplement (https://www.mdpi.com/2311-7524/9/2/282)
Supplement: s1 [file s1]

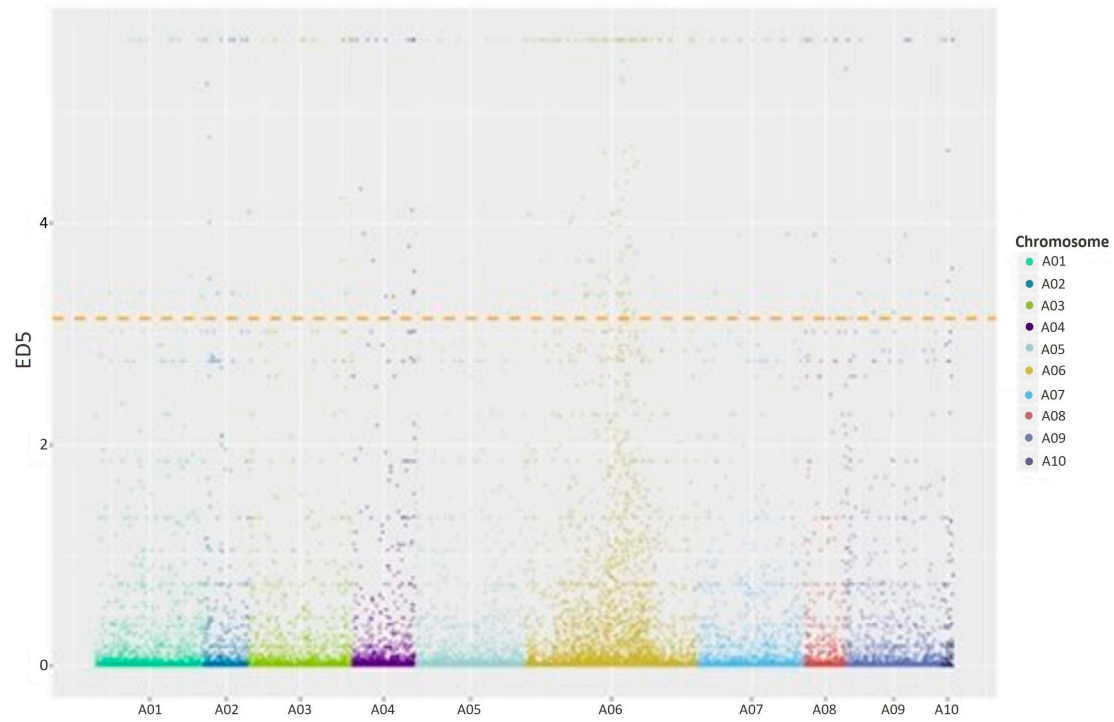

**Figure S1.** ED<sup>5</sup> values of differential SNPs distributed on *Brassica rapa* chromosomes based on the BSR-Seq data. SNP distributions on *B. rapa* chromosomes. The 10 chromosomes are shown on the x-axis and the ED<sup>5</sup> values of the filtered SNP are on the y-axis; the horizontal bar indicates the top 1% threshold value. ED, Euclidean distance; SNP, single nucleotide polymorphism.



|          |                                           |      |
|----------|-------------------------------------------|------|
| Seq1     | ATGTTGCTGAGGCTGAGTCACTTACCTTATGAGCAAGT    | 60   |
| Seq2     | ATGTTGCTGAGGCTGAGTCACTTACCTTATGAGCAAGT    | 60   |
| Seq1.seq | H A S E R C U V D L I E R F S             |      |
| Seq1     | TGAGCACTTATGAGTCTATGATCTATGATCTATGGT      | 80   |
| Seq2     | TGAGCACTTATGAGTCTATGATCTATGATCTATGGT      | 80   |
| Seq1.seq | T F F F F F F F F F F F F F F F F F F F F |      |
| Seq1     | GTTTGTGTTGAGTGAAGCTGATGTTGATGTTATG        | 120  |
| Seq2     | GTTTGTGTTGAGTGAAGCTGATGTTGATGTTATG        | 120  |
| Seq1.seq | V L Y V L I E L A I D F F R M             |      |
| Seq1     | ATGTTCTGATCAAGCAAGTATGATGTTATGATGTTG      | 160  |
| Seq2     | ATGTTCTGATCAAGCAAGTATGATGTTATGATGTTG      | 160  |
| Seq1.seq | R F L F N S L R L A C T T A T T T T T T   |      |
| Seq1     | GCTTATGAGCACTTATGAGCAAGTCTTTTCTTCT        | 200  |
| Seq2     | GCTTATGAGCACTTATGAGCAAGTCTTTTCTTCT        | 200  |
| Seq1.seq | T F F F F F F F F F F F F F F F F F F F F |      |
| Seq1     | TGAGCACTTATGAGTCTGATGATGATGATGATG         | 240  |
| Seq2     | TGAGCACTTATGAGTCTGATGATGATGATGATG         | 240  |
| Seq1.seq | V G L Y V S C I T V T V V R I             |      |
| Seq1     | AAATGATGTTTATGATCACTTACCTGATGATGATCA      | 280  |
| Seq2     | AAATGATGTTTATGATCACTTACCTGATGATGATCA      | 280  |
| Seq1.seq | N S Y V L L I S T F F S A A I             |      |
| Seq1     | AGCTGTGCTGCTGCTGCTGCTGCTGCTGCTGCTG        | 320  |
| Seq2     | AGCTGTGCTGCTGCTGCTGCTGCTGCTGCTGCTG        | 320  |
| Seq1.seq | T T T T T T T T T T T T T T T T T T T T T |      |
| Seq1     | CTGCTGAGCACTTATGAGCAAGTCTTTTCTTCT         | 360  |
| Seq2     | CTGCTGAGCACTTATGAGCAAGTCTTTTCTTCT         | 360  |
| Seq1.seq | R F L F N S L R L A C T T A T T T T T     |      |
| Seq1     | ATGTTCTGATCAAGCAAGTATGATGTTATGATGTTG      | 400  |
| Seq2     | ATGTTCTGATCAAGCAAGTATGATGTTATGATGTTG      | 400  |
| Seq1.seq | A B F I L S R F F S F A A I               |      |
| Seq1     | CGGTGAGCACTTCTTCTGATGATGATGATGATG         | 440  |
| Seq2     | CGGTGAGCACTTCTTCTGATGATGATGATGATG         | 440  |
| Seq1.seq | C C C C C C C C C C C C C C C C C C C C C |      |
| Seq1     | CGGCAAGCACTTCTGAGCAAGTCTGATGATGATG        | 480  |
| Seq2     | CGGCAAGCACTTCTGAGCAAGTCTGATGATGATG        | 480  |
| Seq1.seq | S C C T L I S T V R Y A A I               |      |
| Seq1     | CGCTGCTGCTGCTGCTGCTGCTGCTGCTGCTG          | 520  |
| Seq2     | CGCTGCTGCTGCTGCTGCTGCTGCTGCTGCTG          | 520  |
| Seq1.seq | A G C C F F F F F T L C G                 |      |
| Seq1     | CGTTATGAGCACTTATGAGCAAGTCTTTTCTTCT        | 560  |
| Seq2     | CGTTATGAGCACTTATGAGCAAGTCTTTTCTTCT        | 560  |
| Seq1.seq | F V V G F V V V V V V V V V V V V V V V   |      |
| Seq1     | AGGAGCACTTCTGATGATGATGATGATGATGATG        | 600  |
| Seq2     | AGGAGCACTTCTGATGATGATGATGATGATGATG        | 600  |
| Seq1.seq | N G S D F V V V V V S A A A I             |      |
| Seq1     | CGTATGAGCACTTCTGATGATGATGATGATGATG        | 640  |
| Seq2     | CGTATGAGCACTTCTGATGATGATGATGATGATG        | 640  |
| Seq1.seq | N G S D F V V V V V S A A A I             |      |
| Seq1     | CTATGATCACTTCTGAGCAAGTCTTTTCTTCTG         | 680  |
| Seq2     | CTATGATCACTTCTGAGCAAGTCTTTTCTTCTG         | 680  |
| Seq1.seq | T F L C L R S L V G S C G                 |      |
| Seq1     | TCTGTTCTGCTGATGATGATGATGATGATGATG         | 720  |
| Seq2     | TCTGTTCTGCTGATGATGATGATGATGATGATG         | 720  |
| Seq1.seq | T T T T T T T T T T T T T T T T T T T T T |      |
| Seq1     | ATGTTCTGATCAAGCAAGTATGATGTTATGATGTTG      | 760  |
| Seq2     | ATGTTCTGATCAAGCAAGTATGATGTTATGATGTTG      | 760  |
| Seq1.seq | R F L F N S L R L A C T T A T T T T T     |      |
| Seq1     | GAGTCTGATCAAGCAAGTCTTCTGATGATGATG         | 800  |
| Seq2     | GAGTCTGATCAAGCAAGTCTTCTGATGATGATG         | 800  |
| Seq1.seq | N S Y V L L I S T F F S A A I             |      |
| Seq1     | GAGTCTGATCAAGTCTTCTGAGCAAGTCTTCTG         | 840  |
| Seq2     | GAGTCTGATCAAGTCTTCTGAGCAAGTCTTCTG         | 840  |
| Seq1.seq | T F F F F F F F F F F F F F F F F F F F F |      |
| Seq1     | GAGTCTGATCAAGTCTTCTGAGCAAGTCTTCTG         | 880  |
| Seq2     | GAGTCTGATCAAGTCTTCTGAGCAAGTCTTCTG         | 880  |
| Seq1.seq | T F F F F F F F F F F F F F F F F F F F F |      |
| Seq1     | TGAGCACTTATGAGTCTGATGATGATGATGATG         | 920  |
| Seq2     | TGAGCACTTATGAGTCTGATGATGATGATGATG         | 920  |
| Seq1.seq | L E G T F F V T V V V R D R M             |      |
| Seq1     | GTTTGTGTTGAGTGAAGCTGATGTTGATGTTATG        | 960  |
| Seq2     | GTTTGTGTTGAGTGAAGCTGATGTTGATGTTATG        | 960  |
| Seq1.seq | T F F F F F F F F F F F F F F F F F F F F |      |
| Seq1     | GAGTCTGATCAAGTCTTCTGAGCAAGTCTTCTG         | 1000 |
| Seq2     | GAGTCTGATCAAGTCTTCTGAGCAAGTCTTCTG         | 1000 |
| Seq1.seq | N S Y V L L I S T F F S A A I             |      |
| Seq1     | TGAGCACTTATGAGTCTGATGATGATGATGATG         | 1040 |
| Seq2     | TGAGCACTTATGAGTCTGATGATGATGATGATG         | 1040 |
| Seq1.seq | L E G T F F F S L V V V A                 |      |
| Seq1     | GTTTGTGTTGAGTGAAGCTGATGTTGATGTTATG        | 1080 |
| Seq2     | GTTTGTGTTGAGTGAAGCTGATGTTGATGTTATG        | 1080 |
| Seq1.seq | C C L E I L C F N C F F F F F             |      |
| Seq1     | GAGTCTGATCAAGTCTTCTGAGCAAGTCTTCTG         | 1120 |
| Seq2     | GAGTCTGATCAAGTCTTCTGAGCAAGTCTTCTG         | 1120 |
| Seq1.seq | E C S T F A G C V L F F T                 |      |
| Seq1     | ATGTTCTGATCAAGTATGATGTTATGATGTTG          | 1160 |
| Seq2     | ATGTTCTGATCAAGTATGATGTTATGATGTTG          | 1160 |
| Seq1.seq | T L C E A F F F F V F V L C F A           |      |
| Seq1     | TGAGCACTTATGAGTCTGATGATGATGATGATG         | 1200 |
| Seq2     | TGAGCACTTATGAGTCTGATGATGATGATGATG         | 1200 |
| Seq1.seq | N S Y V L L I S T F F S A A I             |      |
| Seq1     | TTTGTGTTGAGTGAAGCTGATGTTGATGTTATG         | 1240 |
| Seq2     | TTTGTGTTGAGTGAAGCTGATGTTGATGTTATG         | 1240 |

**Figure S3.** The gene sequence of *BraA06g034110.3C*
