# Supplementary material
Source: MDPI journal article supplement (https://www.mdpi.com/2311-7524/9/2/282)
Supplement: s1 [file s1]

**Table S3.** Stem and leaf cell number and area statistics of YS and *Brcdl*<sup>YS</sup>

| Tissue Name                                          | Count | Total Area<br>( $\mu\text{m}^2$ ) | Average Size<br>( $\mu\text{m}^2$ ) |
|------------------------------------------------------|-------|-----------------------------------|-------------------------------------|
| Magnified stem section of YS                         | 55    | 126445                            | 2299                                |
| Magnified stem section of <i>Brcdl</i> <sup>YS</sup> | 27    | 130081                            | 4817                                |
| Leaf section of YS                                   | 442   | 379669                            | 858.980                             |
| Leaf section of <i>Brcdl</i> <sup>YS</sup>           | 339   | 388716                            | 1146.655                            |
| Magnified leaf section of YS                         | 313   | 158677                            | 506.955                             |
| Magnified leaf section of <i>Brcdl</i> <sup>YS</sup> | 229   | 142714                            | 623.205                             |
