# Supplementary material
Source: MDPI journal article supplement (https://www.mdpi.com/2311-7524/9/2/282)
Supplement: s1 [file s1 › Table.S2.xlsx]

## Sheet: Sheet1
Primers sequence
Marker	Forward primer（5’-3’）	Reverse primer（5’-3’）
L04-3	CAAGGGGTTAGTGTCTGCTACA	TGTAGCAGACACTAACCCCTTG
L04-8	CAAGCTCACAAAACTTGGGACT	GCCGACGAAAAAGAATATACTC
L04-12	ATACCAAACCATATCCAAATCC	TAAAACAGAACCGTACCAAACC
L04-15	CACAATCAAGGTGAGTCCTCTT	AGCATATTAATCATCTGCAAGG
L04-17	TGTTACGGATATTTTTAACCTG	GATCATTCTTCCTGAACTCTCT
L04-20	GAACACTCCTTTTATCTCCACT	ATTCCATATCCTTCTTCAAGTT
L06-1	TTAATTTGAGGCTGACACGTAG	TTAGTTCTACGTGTCAGCCTCA
L06-2	GATTATCTCCTTTTTTGTGTCC	GAGGACACAAAAAAGGAGATAA
L06-3	GACCCAGGTACTACGGATTCTC	TGTTCTGTTATACATCTCGTTTTGA
L06-7	ATCTTCTTAGTTTTTCCTGGGG	CCCCAGGAAAAACTAAGAAGAT
L06-4	CAAAAATAGACCACAAATAGGCTA	TGAAAAAAAATTATAAAAAAGTTCG
L06-9	AACCTTCAATACCATTTTGTTTT	ATCGCATTCTCTTTATACTCGTC
L06-10	AGTATGTGAATACGTGACGCTT	TATTAGCTCCCATGTTTTGATC
L06-11	TCAGAATAAAGAAAAAGTGCGTC	GATGGAGTTTTACATAAGGGACA
L06-12	ATCACAAGTAAAACATATCCCG	TTAATAAGAGAGCCCTTTCCAT
L06-13	TCTCGGTCTTTTTGTAGTATGG	TCGTTTTTTTTTTGTTTTTGTT
L06-14	CGGTATAAAAATATTGTTGAAGC	TCATTTCGTGTGTAATCACCTAG
L06-15	TTTAATAATTAGATAAAACGCGGT	TCATCAGAAGAAGAACGAAGGT
L06-17	TGAACTTACAACCGTAGAAAAT	ATTTTCTACGGTTGTAAGTTCA
L06-19	AATTATTGATTCTGTATCCAAAAT	TAAGTATTTTTGGTGATTTGAGTA
33010-C	TCTTTCACAACAATCACACAAC	AAACAACCGAACCAAACATA
34110-C	GTGGACTTCACCCGTTTGTTAG	ATTTGGGCTTTCGTGTCTCTCT
33010-Q	TGTTGTCTCCTCTTTCCTCTTCATC	AGTCTTGTGTGGTTTCTTCTCTTTT
34110-Q	GGCTGGGAGCGATCAAGTTA	TCACCCCAAAACGATAAAAAGCC
