# Supplementary material
Source: MDPI journal article supplement (https://www.mdpi.com/2311-7524/9/2/282)
Supplement: s1 [file s1 › Table.S4.xlsx]

## Sheet: Sheet1
Candidate gene annotation
Gene ID	Start	End	Arabidopsis thaliana homologous gene	Annotation
BraA06g033010.3C	22597175	22599369	AT5G25900	Encodes a member of the CYP701A cytochrome p450 family that is involved in later steps of the gibberellin biosynthetic pathway.
BraA06g034110.3C	23226835	23228525	AT5G27320	Encodes a gibberellin (GA) receptor ortholog of the rice GA receptor gene (OsGID1). Has GA-binding activity, showing higher affinity to GA4. Interacts with DELLA proteins in vivo in the presence of GA4.
